# Supplementary material for: Prediction of years of life after diagnosis of breast cancer using omics and omic-by-treatment interactions
Source: PubMed Central journal article supplement — Eur J Hum Genet. 2017 Mar 8;25(5):538–44. doi: 10.1038/ejhg.2017.12 (PMC5437894; doi:10.1038/ejhg.2017.12), 2017-03-08
Supplement: ejhg201712x1.pdf [file ejhg201712x1.pdf]

---

|                      | <b>AGE</b>     | <b>NPI</b> | <b>TC</b> | <b>CT</b> | <b>RT</b> | <b>HT</b> | <b>CS</b> |
|----------------------|----------------|------------|-----------|-----------|-----------|-----------|-----------|
|                      | <b>(years)</b> |            |           |           |           |           |           |
| <b>Overall death</b> | -0.272         | -0.384     | -0.049    | -0.213    | 0.094     | 0.140     | 0.059     |
|                      | (0.094)        | (0.044)    | (0.038)   | (0.044)   | (0.040)   | (0.037)   | (0.053)   |

---
