# Supplementary material for: Prediction of years of life after diagnosis of breast cancer using omics and omic-by-treatment interactions
Source: PubMed Central journal article supplement — Eur J Hum Genet. 2017 Mar 8;25(5):538–44. doi: 10.1038/ejhg.2017.12 (PMC5437894; doi:10.1038/ejhg.2017.12), 2017-03-08
Supplement: ejhg201712x2.pdf [file ejhg201712x2.pdf]

**AUC (SE)**

| Model               | t=1           | t=2           | t=3           | t=4           |
|---------------------|---------------|---------------|---------------|---------------|
| <b>COV</b>          | 0.718 (0.001) | 0.750 (0.001) | 0.762 (0.000) | 0.773 (0.000) |
| <b>COV+CNV</b>      | 0.711 (0.001) | 0.755 (0.001) | 0.769 (0.001) | 0.786 (0.001) |
| <b>COV+GE</b>       | 0.746 (0.002) | 0.784 (0.002) | 0.797 (0.001) | 0.808 (0.001) |
| <b>COV+GE+CNV</b>   | 0.741 (0.005) | 0.781 (0.004) | 0.794 (0.002) | 0.805 (0.002) |
| <b>COV+GE+GExCT</b> | 0.764 (0.010) | 0.786 (0.003) | 0.801 (0.002) | 0.809 (0.003) |
| <b>COV+GE+GExHT</b> | 0.741 (0.012) | 0.792 (0.006) | 0.794 (0.004) | 0.809 (0.004) |
| <b>COV+GE+GExRT</b> | 0.766 (0.007) | 0.784 (0.005) | 0.795 (0.002) | 0.805 (0.002) |
|                     | <b>t=5</b>    | <b>t=6</b>    | <b>t=7</b>    |               |
| <b>COV</b>          | 0.753 (0.000) | 0.748 (0.000) | 0.741 (0.000) |               |
| <b>COV+CNV</b>      | 0.773 (0.001) | 0.767 (0.001) | 0.758 (0.001) |               |
| <b>COV+GE</b>       | 0.793 (0.001) | 0.787 (0.001) | 0.776 (0.001) |               |
| <b>COV+GE+CNV</b>   | 0.792 (0.002) | 0.785 (0.001) | 0.776 (0.001) |               |
| <b>COV+GE+GExCT</b> | 0.792 (0.002) | 0.785 (0.002) | 0.776 (0.002) |               |
| <b>COV+GE+GExHT</b> | 0.793 (0.003) | 0.790 (0.003) | 0.782 (0.003) |               |
| <b>COV+GE+GExRT</b> | 0.791 (0.003) | 0.784 (0.002) | 0.774 (0.002) |               |

---
