# Supplementary material for: Prediction of years of life after diagnosis of breast cancer using omics and omic-by-treatment interactions
Source: PubMed Central journal article supplement — Eur J Hum Genet. 2017 Mar 8;25(5):538–44. doi: 10.1038/ejhg.2017.12 (PMC5437894; doi:10.1038/ejhg.2017.12), 2017-03-08
Supplement: ejhg201712x3.pdf [file ejhg201712x3.pdf]

| <b>Model</b>                        | <b>LogLikAtPostMean</b> | <b>AUC</b>   |
|-------------------------------------|-------------------------|--------------|
| <b>COV+GE</b>                       | -753.56                 | 0.808        |
| <b>COV+GExHT</b>                    | -794.91                 | 0.809        |
| <b><u>COV+GExHT+GExRT+GExCT</u></b> | <u>-752.46</u>          | <u>0.807</u> |
