# Supplementary figures and images for: Prediction of years of life after diagnosis of breast cancer using omics and omic-by-treatment interactions
Source: PubMed Central journal article supplement — Eur J Hum Genet. 2017 Mar 8;25(5):538–44. doi: 10.1038/ejhg.2017.12 (PMC5437894; doi:10.1038/ejhg.2017.12), 2017-03-08

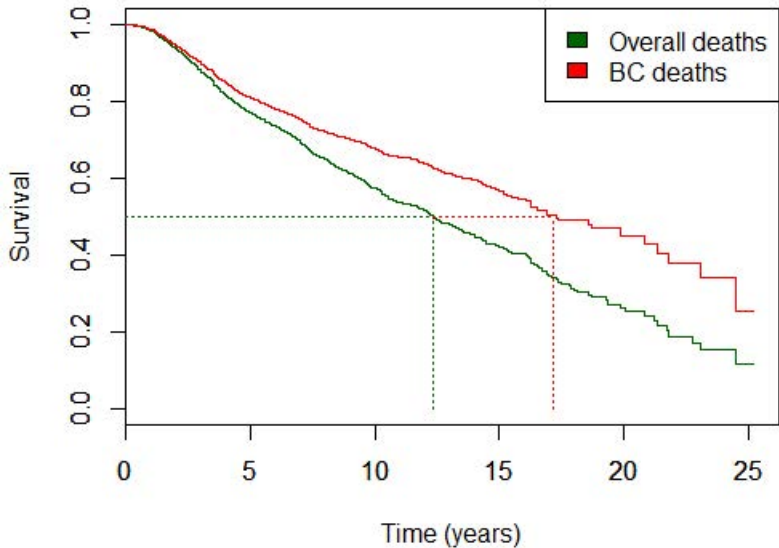

Supplement: ejhg201712x4.pdf [file ejhg201712x4.pdf]
